# Supplementary material
Source: publisher figshare collection journal article supplement (https://acs.figshare.com/ndownloader/files/4663300)
Supplement: Supplementary file 1 [file 4663300]

# **Maximum Rate of Crystallization and Morphology of Random Propylene Ethylene Copolymers as a Function of Concentration of Comonomer up to 21 mol% Ethylene**

K. Jeon, Y.L. Chiari and R.G. Alamo\*

*Florida Agricultural and Mechanical University and Florida State University College of Engineering, Department of Chemical and Biomedical Engineering, 2525 Pottsdamer St. Tallahassee, FL 32310-6046*

Supporting information.

In order to properly scale and subtract the diffractogram of the amorphous regions, diffractograms of PEs with ethylene > 10 mol% were obtained at different temperatures in the melt. An example is given in Figure S1a for PE16.9. The  $2\theta$  peak of the halo scales linearly with temperature (Figure S1b), reflecting the thermal volume expansion of the radial coils. This linear relation ( $2\theta_{\text{halo}} = -0.008T + 17.4$ ) was used to shift the diffractogram of the melt to the corresponding value at  $T_c > 25\text{ }^\circ\text{C}$ . The procedure and the determination of the content of  $\gamma$  phase using mixed Gaussian + Lorentzian peaks to fit the resulting crystalline pattern is shown in Figure S1c.

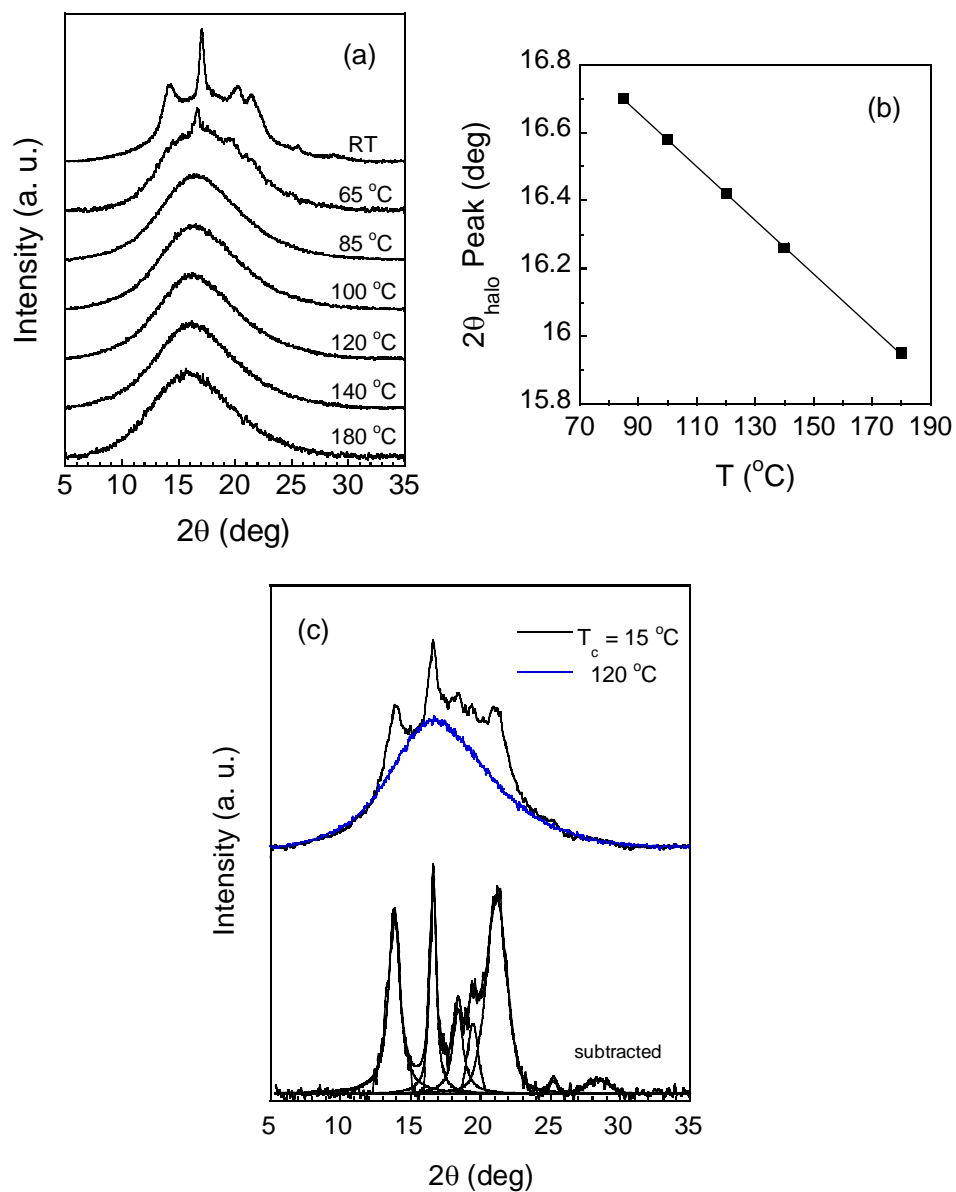

**Figure S1.** (a) Diffractograms of PE16.9 obtained at increasing temperatures. (b) Variation of  $2\theta_{\text{halo}}$  with temperature reflecting volume expansion of radial coils. (c) Extraction of crystalline diffractogram and peak deconvolution to obtain crystallinity and polymorphic content.

Lamellar thicknesses were measured from cross-section profiles from AFM phase images, using the Jeol AFM process software. The thicknesses were obtained in edge-on lamellae from  $0.6 \times 0.6 \mu\text{m}^2$  images as exemplified in Figure S2.

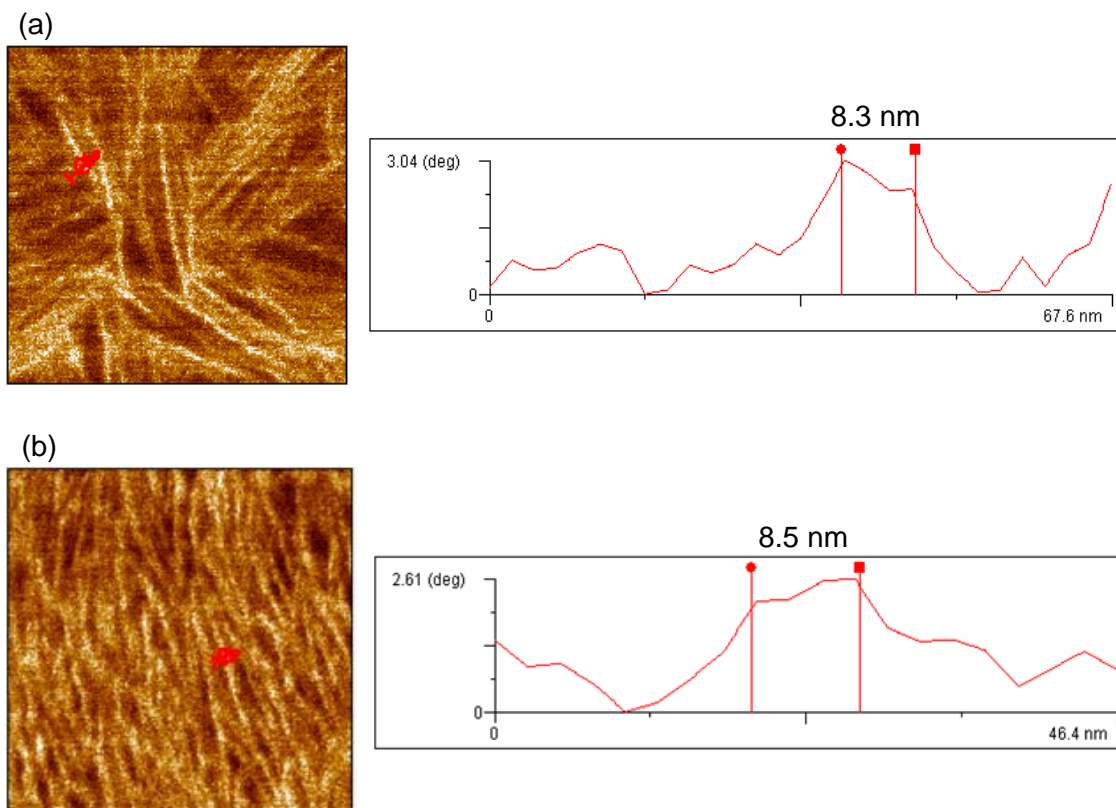

**Figure S2.** Representative examples of cross-section profiles for measurements of lamellar thicknesses. The phase images ( $0.6 \times 0.6 \mu\text{m}^2$ ) and the corresponding cross-section profiles are for (a) the PE20.8 film crystallized at 35 °C, and (b) the PE16.9 film at 45 °C.

Determination of partitioning of ethylene for copolymers with high ethylene content.

Shown are solid-state  $^{13}\text{C}$  NMR crystal spectra and analysis of areas of peaks associated with ethylene carbons (Reference 9 of manuscript).

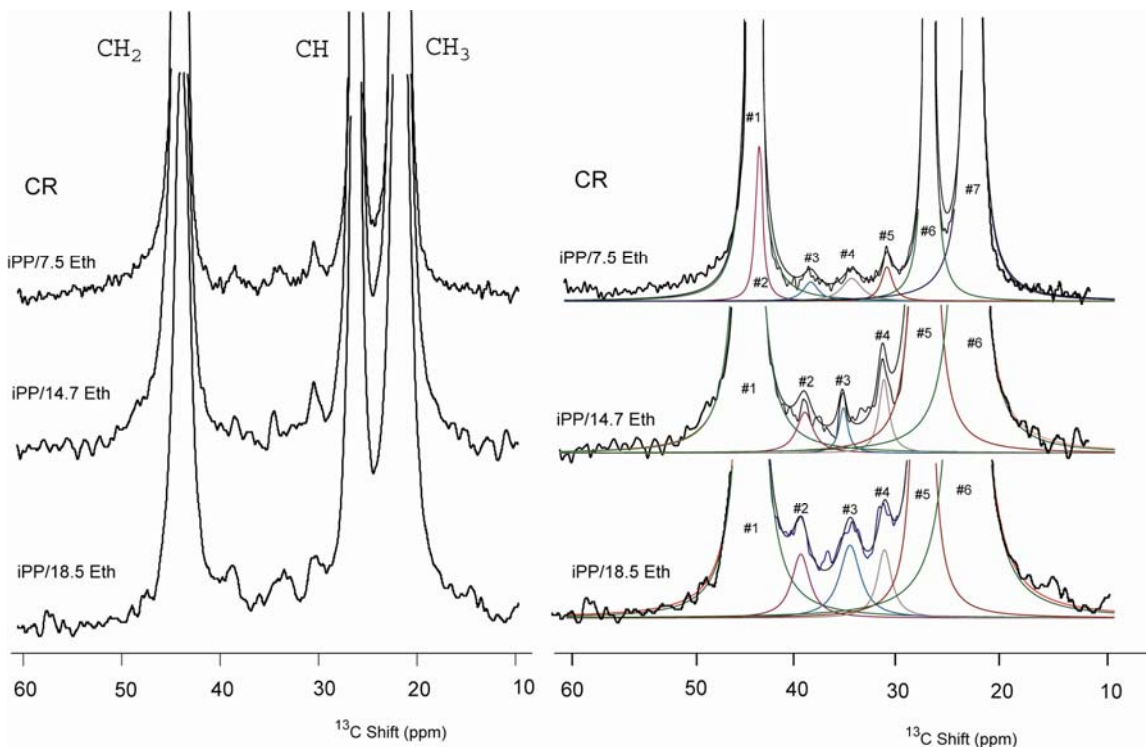

Vertically amplified 75.5 MHz  $^{13}\text{C}$  CP MAS spectra collected with contact times of 1 ms and spin lock of 6ms (iPP/7.5 Eth), and 3ms (iPP/14.7 Eth, iPP/18.5 Eth). The spectrum of iPP/7.5 Eth was recorded at ambient temperature and iPP/14.7 Eth, iPP/18.5 Eth at 290 K because these two last samples have lower melting temperature. Deconvolutions were processed on the basis of Gaussian/Lorentzian shapes using "dmfit program".<sup>1</sup> The peak number correspond to the number of deconvoluted peaks in the spectra.

1. Massiot, D.; Fayon, F.; Capron, M.; King, I.; Le Calvé, S.; Alonso, B.; Durand, J.-O.; Bujoli, B.; Gan, Z.; Hoatson, G. *Magn. Reson. Chem.* **2002**, 40, 70-76.
